# Supplementary material for: Post column infusion of an internal standard into LC-FT-ICR MS enables semi-quantitative comparison of dissolved organic matter in original samples
Source: Royal Society of Chemistry journal article supplement (doi:10.1039/d4an00119b), 2024-01-01
Supplement: d4an00119b1.pdf [file d4an00119b1.pdf]

Supplementary information for:  
Post column infusion of an internal standard into LC-FT-ICR MS  
enables semi-quantitative comparison of dissolved organic matter in  
original samples

Rebecca Rodrigues Matos<sup>a</sup>, Elaine K. Jennings<sup>a</sup>, Jan Kaesler<sup>a</sup>, Thorsten Reemtsma<sup>a,b</sup>, Boris P. Koch<sup>c,d</sup>, Oliver J. Lechtenfeld<sup>a,e,\*</sup>

<sup>a</sup> Department of Environmental Analytical Chemistry, Helmholtz Centre for Environmental Research – UFZ, Permoserstr. 15, 04318 Leipzig, Germany

<sup>b</sup> Institute of Analytical Chemistry, University of Leipzig, 04103 Leipzig, Germany

<sup>c</sup> Alfred-Wegener-Institute Helmholtz Centre for Polar and Marine Research, Ecological Chemistry, Am Handelshafen 12, 27570 Bremerhaven, Germany

<sup>d</sup> Hochschule Bremerhaven, University of Applied Sciences, An der Karlstadt 8, 27568 Bremerhaven, Germany

<sup>e</sup> ProVIS–Centre for Chemical Microscopy, Helmholtz Centre for Environmental Research – UFZ, Permoserstr. 15, 04318 Leipzig, Germany

\* Corresponding author

**SI Text: 1**

**SI Tables: 7**

**SI Figures: 9**

## SI 1 – Materials and Methods

**Table SI 1.1** – Model compounds used in this study.

| Model compound                                               | [M+H] <sup>-</sup> | Molecular formula                                             | Chemical structure | RT (min) | Concentration (ng mL <sup>-1</sup> ) |
|--------------------------------------------------------------|--------------------|---------------------------------------------------------------|--------------------|----------|--------------------------------------|
| D-glucuronic acid                                            | 193.0354           | C <sub>6</sub> H <sub>10</sub> O <sub>7</sub>                 |                    | 5.04     | 25                                   |
| 2-(4-(2,2-Dicarboxy-ethyl)-2,5-dimethoxy-benzyl)malonic acid | 369.0827           | C <sub>16</sub> H <sub>18</sub> O <sub>10</sub>               |                    | 14.25    | 4                                    |
| Fraxin                                                       | 369.0827           | C <sub>16</sub> H <sub>18</sub> O <sub>10</sub>               |                    | 16.04    | 8                                    |
| Isoferulic acid 3-O-β-D-glucuronide                          | 369.0827           | C <sub>16</sub> H <sub>18</sub> O <sub>10</sub>               |                    | 15.06    | 4                                    |
| Leu-enkephalin                                               | 554.262            | C <sub>28</sub> H <sub>37</sub> N <sub>5</sub> O <sub>7</sub> |                    | 16.13    | 5                                    |
| Vanillic acid                                                | 167.035            | C <sub>8</sub> H <sub>8</sub> O <sub>4</sub>                  |                    | 15.34    | 50                                   |

### Text SI 1.1 – Holtemme and Elbe sample site description.

While Holtemme spring (51° 47' N 10° 40' E) and Elbe River (53° 3' N, 11° 32' E) native samples were comparable based on their DOC concentration (6.39 mg C L<sup>-1</sup> and 5.27 mg C L<sup>-1</sup> respectively), they represent a large compositional gradient. Holtemme is a small third order stream draining a mountainous forested in the Elbe catchment area.<sup>1</sup> The Holtemme river merges with the rivers Bode, then Saale and ultimately Elbe, which drains a catchment of 148,000 km<sup>2</sup>. Elbe, thus, represents the DOM from a mix of sources, including photoautotrophic and anthropogenically impacted DOM (*e.g.* agricultural and wastewater treatment effluent). The native Elbe sample was collected on May 5<sup>th</sup> of 2022 and Holtemme spring on May 24<sup>th</sup> of 2022.

**Table SI 1.2** – Calibrants and their  $m/z$  values used in this study.

| Calibrant | $m/z$      | Calibrant | $m/z$    |
|-----------|------------|-----------|----------|
| C8H5O4    | 165.019332 | C21H21O9  | 417.1191 |
| C8H7O4    | 167.034982 | C21H23O9  | 419.1348 |
| C8H11O4   | 171.066282 | C21H25O9  | 421.1504 |
| C6H11O6   | 179.056112 | C20H23O10 | 423.1297 |
| C10H9O4   | 193.050632 | C20H25O10 | 425.1453 |
| C9H7O5    | 195.029897 | C17H15O13 | 427.0518 |
| C10H15O4  | 199.097583 | C19H23O11 | 427.1246 |
| C10H9O5   | 209.045547 | C18H21O12 | 429.1039 |
| C9H7O6    | 211.024812 | C22H23O9  | 431.1348 |
| C11H9O5   | 221.045547 | C22H25O9  | 433.1504 |
| C10H7O6   | 223.024812 | C22H27O9  | 435.1661 |
| C9H5O7    | 225.004076 | C21H25O10 | 437.1453 |
| C10H9O6   | 225.040462 | C20H23O11 | 439.1246 |
| C11H15O5  | 227.092497 | C20H25O11 | 441.1402 |
| C11H7O6   | 235.024812 | C21H15O11 | 443.062  |
| C12H11O5  | 235.061197 | C21H17O11 | 445.0776 |
| C11H9O6   | 237.040462 | C20H15O12 | 447.0569 |
| C11H11O6  | 239.056112 | C22H25O10 | 449.1453 |
| C11H15O6  | 243.087412 | C22H27O10 | 451.161  |
| C12H7O6   | 247.024812 | C21H25O11 | 453.1402 |
| C12H9O6   | 249.040462 | C21H27O11 | 455.1559 |
| C12H11O6  | 251.056112 | C20H25O12 | 457.1352 |
| C13H17O5  | 253.108147 | C23H23O10 | 459.1297 |
| C16H31O2  | 255.232954 | C23H25O10 | 461.1453 |
| C12H17O6  | 257.103062 | C23H27O10 | 463.161  |
| C13H9O6   | 261.040462 | C22H25O11 | 465.1402 |
| C14H15O5  | 263.092497 | C22H27O11 | 467.1559 |
| C12H9O7   | 265.035376 | C21H25O12 | 469.1352 |
| C13H15O6  | 267.087412 | C20H23O13 | 471.1144 |
| C13H17O6  | 269.103062 | C21H13O13 | 473.0362 |
| C12H15O7  | 271.082326 | C23H23O11 | 475.1246 |
| C14H11O6  | 275.056112 | C23H25O11 | 477.1402 |
| C15H17O5  | 277.108147 | C22H23O12 | 479.1195 |
| C14H15O6  | 279.087412 | C21H21O13 | 481.0988 |
| C14H17O6  | 281.103062 | C21H23O13 | 483.1144 |
| C13H15O7  | 283.082326 | C21H25O13 | 485.1301 |
| C13H17O7  | 285.097976 | C23H19O12 | 487.0882 |
| C12H15O8  | 287.077241 | C25H29O10 | 489.1766 |
| C14H9O7   | 289.035376 | C24H27O11 | 491.1559 |
| C15H15O6  | 291.087412 | C24H29O11 | 493.1715 |
| C15H17O6  | 293.103062 | C24H31O11 | 495.1872 |
| C15H19O6  | 295.118712 | C19H15O16 | 499.0366 |
| C12H9O9   | 297.025205 | C22H27O13 | 499.1457 |
| C14H17O7  | 297.097976 | C23H17O13 | 501.0675 |
| C13H15O8  | 299.077241 | C24H23O12 | 503.1195 |
| C15H9O7   | 301.035376 | C22H17O14 | 505.0624 |
| C16H15O6  | 303.087412 | C24H27O12 | 507.1508 |
| C15H13O7  | 305.066676 | C23H25O13 | 509.1301 |
| C15H15O7  | 307.082326 | C23H27O13 | 511.1457 |
| C15H17O7  | 309.097976 | C24H17O13 | 513.0675 |
| C13H11O9  | 311.040856 | C26H27O11 | 515.1559 |
| C15H19O7  | 311.113627 | C23H17O14 | 517.0624 |
| C13H13O9  | 313.056506 | C26H31O11 | 519.1872 |

|           |            |           |          |
|-----------|------------|-----------|----------|
| C14H17O8  | 313.092891 | C25H29O12 | 521.1665 |
| C13H15O9  | 315.072156 | C24H27O13 | 523.1457 |
| C15H9O8   | 317.030291 | C24H29O13 | 525.1614 |
| C15H11O8  | 319.045941 | C24H31O13 | 527.177  |
| C16H17O7  | 321.097976 | C27H29O11 | 529.1715 |
| C16H19O7  | 323.113627 | C25H23O13 | 531.1144 |
| C15H17O8  | 325.092891 | C26H29O12 | 533.1665 |
| C15H19O8  | 327.108541 | C24H23O14 | 535.1093 |
| C14H17O9  | 329.087806 | C25H29O13 | 537.1614 |
| C18H19O6  | 331.1187   | C24H27O14 | 539.1406 |
| C17H17O7  | 333.098    | C24H29O14 | 541.1563 |
| C15H11O9  | 335.0409   | C28H31O11 | 543.1872 |
| C16H17O8  | 337.0929   | C27H29O12 | 545.1665 |
| C14H11O10 | 339.0358   | C26H27O13 | 547.1457 |
| C16H19O8  | 339.1085   | C26H29O13 | 549.1614 |
| C16H21O8  | 341.1242   | C26H31O13 | 551.177  |
| C15H19O9  | 343.1035   | C25H29O14 | 553.1563 |
| C14H17O10 | 345.0827   | C24H27O15 | 555.1355 |
| C18H19O7  | 347.1136   | C26H21O14 | 557.0937 |
| C17H17O8  | 349.0929   | C25H19O15 | 559.0729 |
| C17H19O8  | 351.1085   | C26H25O14 | 561.125  |
| C17H21O8  | 353.1242   | C27H31O13 | 563.177  |
| C16H19O9  | 355.1035   | C26H29O14 | 565.1563 |
| C16H21O9  | 357.1191   | C26H31O14 | 567.1719 |
| C17H11O9  | 359.0409   | C26H17O15 | 569.0573 |
| C19H21O7  | 361.1293   | C27H23O14 | 571.1093 |
| C19H23O7  | 363.1449   | C26H21O15 | 573.0886 |
| C18H21O8  | 365.1242   | C25H19O16 | 575.0679 |
| C17H19O9  | 367.1035   | C25H21O16 | 577.0835 |
| C15H13O11 | 369.0463   | C25H23O16 | 579.0992 |
| C17H21O9  | 369.1191   | C27H33O14 | 581.1876 |
| C16H19O10 | 371.0984   | C26H17O16 | 585.0522 |
| C16H21O10 | 373.114    | C26H19O16 | 587.0679 |
| C19H19O8  | 375.1085   | C29H33O13 | 589.1927 |
| C19H21O8  | 377.1242   | C27H27O15 | 591.1355 |
| C19H23O8  | 379.1398   | C25H21O17 | 593.0784 |
| C18H21O9  | 381.1191   | C27H19O16 | 599.0679 |
| C17H19O10 | 383.0984   | C27H21O16 | 601.0835 |
| C16H17O11 | 385.0776   | C27H23O16 | 603.0992 |
| C19H15O9  | 387.0722   | C26H21O17 | 605.0784 |
| C19H17O9  | 389.0878   | C26H23O17 | 607.0941 |
| C20H21O8  | 389.1242   | C29H37O14 | 609.2189 |
| C20H23O8  | 391.1398   | C28H21O16 | 613.0835 |
| C19H21O9  | 393.1191   | C27H19O17 | 615.0628 |
| C19H23O9  | 395.1348   | C27H21O17 | 617.0784 |
| C16H13O12 | 397.0412   | C27H23O17 | 619.0941 |
| C18H21O10 | 397.114    | C27H25O17 | 621.1097 |
| C17H19O11 | 399.0933   | C28H21O17 | 629.0784 |
| C19H13O10 | 401.0514   | C27H21O18 | 633.0733 |
| C20H19O9  | 403.1035   | C27H23O18 | 635.089  |
| C20H21O9  | 405.1191   | C29H21O17 | 641.0784 |
| C20H23O9  | 407.1348   | C29H23O17 | 643.0941 |
| C19H21O10 | 409.114    | C29H25O17 | 645.1097 |
| C19H23O10 | 411.1297   | C29H27O17 | 647.1254 |
| C19H25O10 | 413.1453   | C29H29O17 | 649.141  |
| C17H19O12 | 415.0882   | C29H31O17 | 651.1567 |

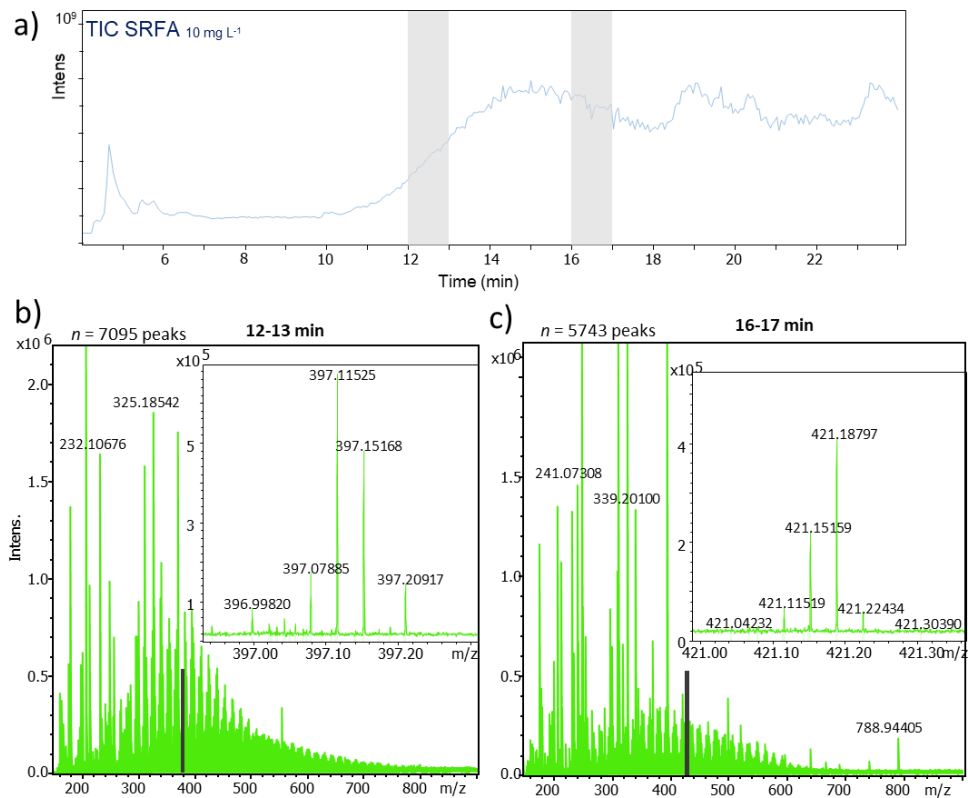

**Figure SI 1.1** – a) Total ion chromatogram (TIC) of SRFA injected at 10 mg carbon L<sup>-1</sup>. The grey areas at 12-13 min and 16-17 min represent the retention times for which averaged mass spectra are displayed below in b and c. The inset in b and c represents the zoomed mass spectra at b) nominal m/z 397 and c) nominal m/z 421. Note that 2 MW (corresponding to 0.8 s transients with 147 start m/z at 12 T) provides sufficient mass resolution to resolve major DOM species in the considered mass range.

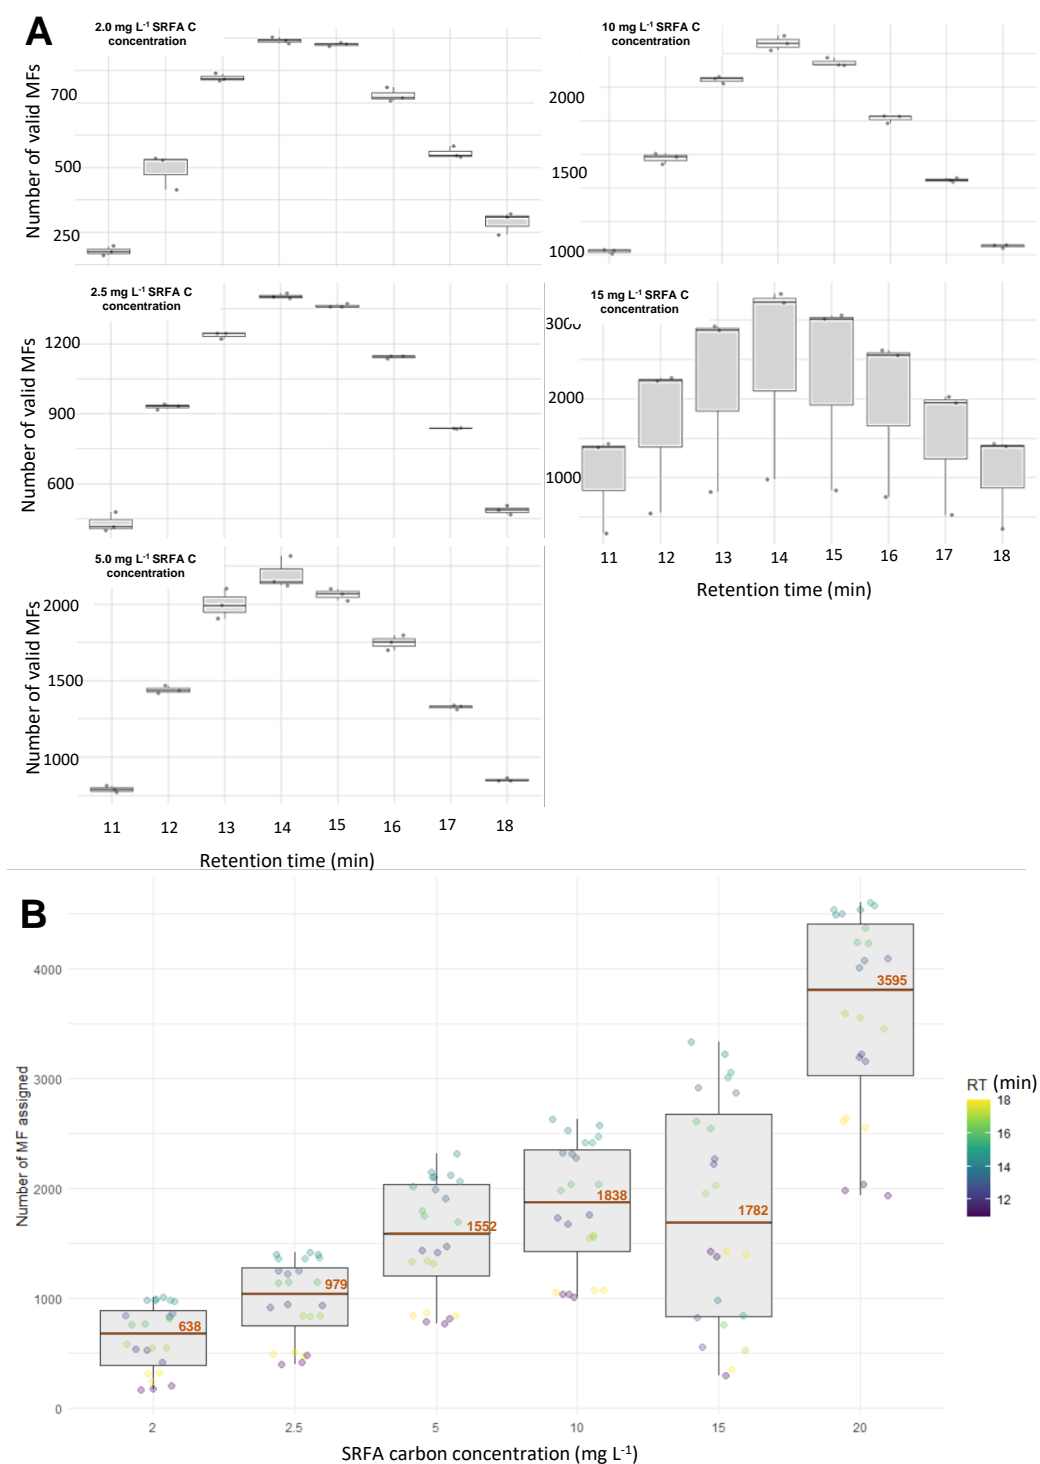

**Figure SI.1.2** – Box plot showing the variation on the number of valid molecular formulas (MFs) found across triplicates at a given concentration (2, 2.5, 5, 10, and 15 mg C L<sup>-1</sup>) split according to a) the processed retention times (RTs), and b) found across triplicates at a given concentration (2, 2.5, 5, 10, 15, and 20 mg C L<sup>-1</sup>). In a) within a RT (comparing the triplicates), the number of valid MF is highly reproducible. The most prominent variation is observed for 15 mg C L<sup>-1</sup> probably due to an error during sample management. In b) one dot represents one measurement, therefore, one RT. The variation on the number of valid MFs increased with the concentration (713 MFs @ 2 mg L<sup>-1</sup>, 1072 MFs @ 2.5 mg L<sup>-1</sup>, 1690 MFs @ 5 mg L<sup>-1</sup>, 2007 MFs @ 10 mg L<sup>-1</sup>, and 1854 MFs @ 15 mg L<sup>-1</sup>).

**Table SI 1.2** – Percentage of the total molecular formulas (MFs) used for coefficient of variance (CV) calculation. Each row is a sum of processed RTs (from 11 to 18 min) of the respective concentration triplicates. For CV calculations, the testable peaks were the MFs shared between the triplicate measurements.

| Concentration<br>(mg C L <sup>-1</sup> ) | Total number of peaks<br>in the triplicates | Percentage of MFs present in<br>the triplicates (testable peaks)<br>(%) |
|------------------------------------------|---------------------------------------------|-------------------------------------------------------------------------|
| 2                                        | 23495                                       | 60                                                                      |
| 2.5                                      | 15311                                       | 69                                                                      |
| 5                                        | 37238                                       | 74                                                                      |
| 10                                       | 44111                                       | 75                                                                      |
| 15                                       | 42770                                       | 15                                                                      |

**Table SI 1.3** – Count of molecular formulas (MFs) used for linear regression model fit for each RT. Each row is the sum of MFs from the SRFA concentrations 2 to 15 mg C L<sup>-1</sup> in triplicate. For the linear regression assessment, the testable peaks were the MFs found more than 10 times.

| Retention time<br>(min) | Number of<br>valid MFs | Number MFs occur > 10<br>times in all conc<br>(testable peaks) | Percent of MFs<br>(%) |
|-------------------------|------------------------|----------------------------------------------------------------|-----------------------|
| 11                      | 18233                  | 3048                                                           | 17                    |
| 12                      | 31076                  | 9233                                                           | 30                    |
| 13                      | 41971                  | 13213                                                          | 31                    |
| 14                      | 47875                  | 15719                                                          | 33                    |
| 15                      | 46271                  | 15159                                                          | 33                    |
| 16                      | 39972                  | 12495                                                          | 31                    |
| 17                      | 30955                  | 8496                                                           | 27                    |
| 18                      | 21299                  | 4388                                                           | 21                    |

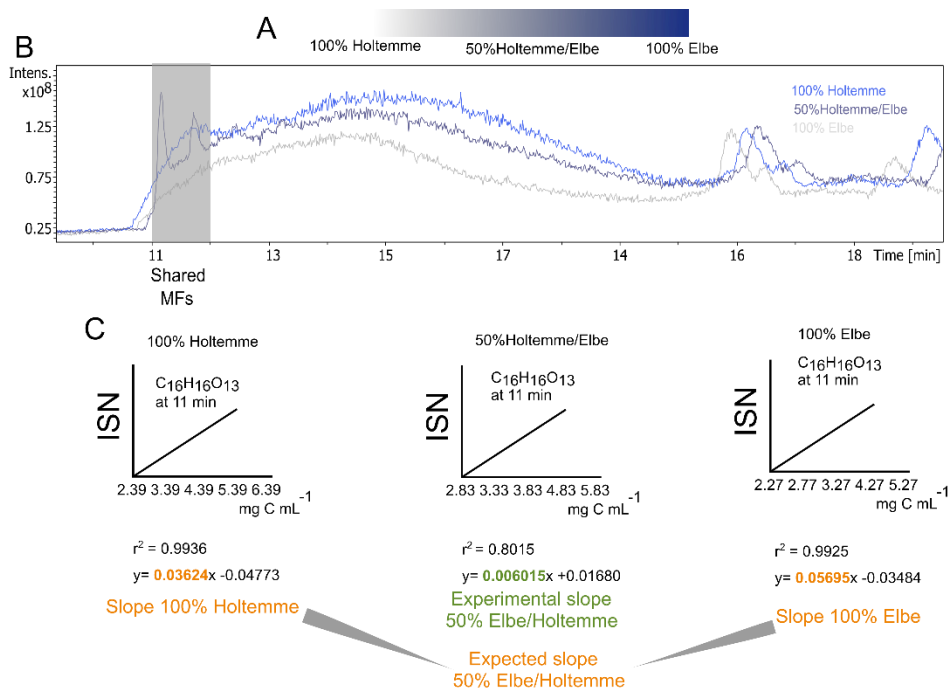

**Figure SI 1.3** – A) Environmental gradient between Holtemme spring (100% Holtemme) and Elbe river (100% Elbe) samples. The third sample (50% Elbe/Holtemme) is composed of half volume of each of the two firsts samples. B) Total ion chromatogram of three samples. The grey area in (segment 11-12 min) is an example of how the data was treated: only molecular formulas (MFs) shared between the three samples in a given segment were considered. C) A dilution series of each of the three samples was made and for each of the shared MFs a linear regression analysis was performed. From the linear regression analysis, the expected slope 50% Elbe/Holtemme was calculated from the slopes of the 100% samples.



## SI 2 – Performance of PCI-IS for variable concentrations

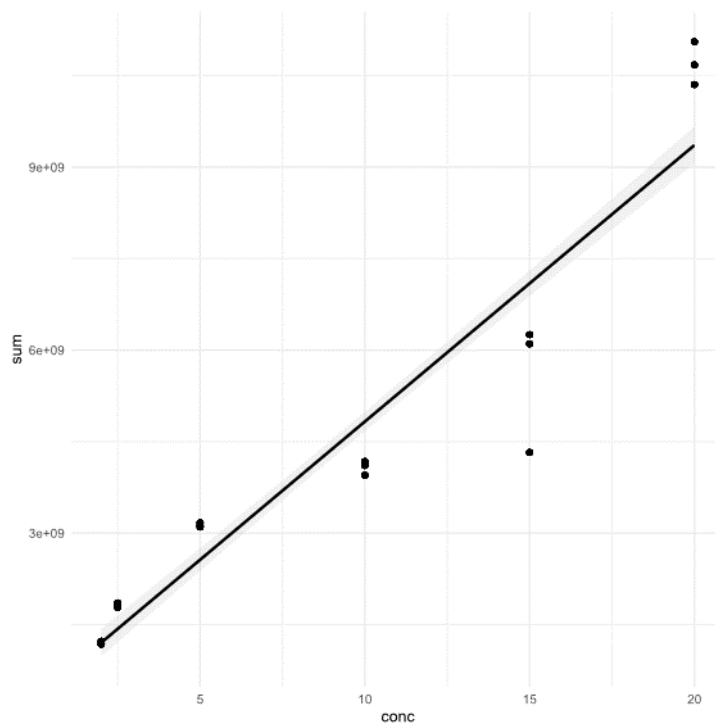

**Figure SI 2.1** - Linear regression of sum of all assigned peak intensities versus SRFA carbon concentration (2, 2.5, 5, 10, 15 and, 20 mg C L<sup>-1</sup>).

**Table SI 2.1** – Mean, standard deviation (SD) and coefficient of variance (CV) of naproxen-D<sub>3</sub> intensity for the 15 runs shown in Figure 2b in the main text.

| Naproxen-D <sub>3</sub> intensity<br>(± SD) | RT<br>(min) | CV<br>(%) |
|---------------------------------------------|-------------|-----------|
| 818384 ± 112532                             | 11          | 14        |
| 1844777 ± 136195                            | 12          | 7         |
| 3176678 ± 124387                            | 13          | 4         |
| 4012133 ± 169294                            | 14          | 4         |
| 4046379 ± 202194                            | 15          | 5         |
| 3550172 ± 171373                            | 16          | 5         |
| 2947751 ± 72978                             | 17          | 2         |
| 2167286 ± 277418                            | 18          | 13        |

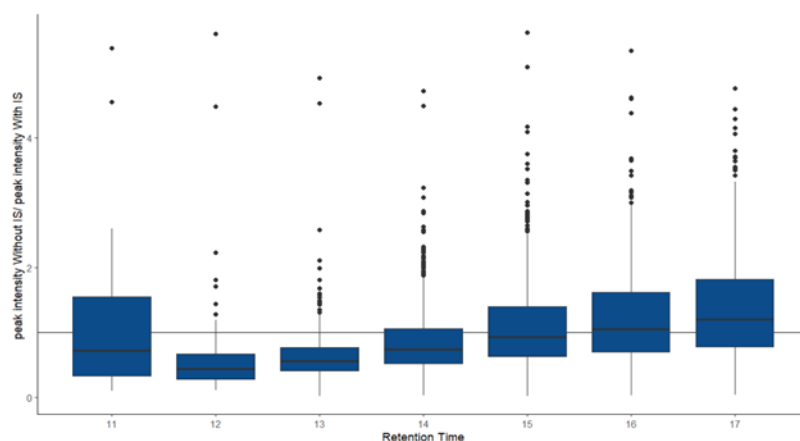

**Figure SI 2.2** – Box plot of the ratio between molecular formulas (MFs) absolute peak intensity (RAW) and PCI-IS transformed peak intensities (ISN) for RTs between 11 and 18 min. The shared MFs between the SRFA injected at 2 mg C L<sup>-1</sup> with and without PCI-IS in the respective RT was used. The y-axis represents the ratio between peak intensity without IS and peak intensity with IS from 1. If the IS does not play an impact in the DOM analytes, the absolute intensity of the sample with and without IS should be similar and the ratio between them close to 1. The deviation from 1 particularly occurred in earlier RTs, indicating that those analytes suffer from enhancement when the PCI-IS is used. As an overall result, the use of PCI-IS slightly impact the ionization of DOC analytes.

### SI 3 – Compensation of matrix effects by PCI-IS

**Table 3.1** – Linearity data of model compound (MCs)

| Compound name                                                              | Matrix                     | RAW                    |                                   |               | PCI-IS               |                                         |                     |
|----------------------------------------------------------------------------|----------------------------|------------------------|-----------------------------------|---------------|----------------------|-----------------------------------------|---------------------|
|                                                                            |                            | Linear equation        | Pearson's correlation coef. (RAW) | p-value (RAW) | Linear equation      | Pearson's correlation coef. (MC/PCI-IS) | p-value (MC/PCI-IS) |
| D-glucuronic acid<br>RT 5.05 min                                           | MQW                        | y = 386215x - 2129943  | 0.9632                            | 8.64E-09      | y = 0.2337x - 0.7187 | 0.9947                                  | 3.02E-14            |
|                                                                            | SRFA 10 mg L <sup>-1</sup> | y = 385448x + 42075    | 0.9882                            | 1.22E-08      | y = 0.2321x - 0.0266 | 0.9968                                  | 3.51E-11            |
|                                                                            | Elbe                       | y = 8112x - 98457      | 0.9446                            | 3.85E-05      | y = 0.0104x + 0.0507 | 0.9549                                  | 1.72E-05            |
|                                                                            | Strob.                     | y = 10112x - 91327     | 0.9816                            | 1.53E-05      | y = 0.0139x - 0.0733 | 0.9874                                  | 4.96E-06            |
| 2-(4-(2,2-Dicarboxyethyl)-2,5-dimethoxybenzyl)malonic acid<br>RT 14.26 min | MQW                        | y = 1322192x - 260479  | 0.9487                            | 7.20E-08      | y = 0.0828x - 0.1339 | 0.9817                                  | 9.63E-11            |
|                                                                            | SRFA 10 mg L <sup>-1</sup> | y = 902728x - 1435520  | 0.9964                            | 6.12E-11      | y = 0.0604x - 0.0002 | 0.9988                                  | 3.48E-13            |
|                                                                            | Elbe                       | y = 1266567x - 2433241 | 0.9953                            | 1.55E-13      | y = 0.0793x - 0.0838 | 0.9927                                  | 2.11E-12            |
|                                                                            | Strob.                     | y = 1210244x - 1945558 | 0.9993                            | 1.16E-18      | y = 0.0790x - 0.0990 | 0.9992                                  | 5.27E-18            |
| Fraxin<br>RT 16.03 min                                                     | MQW                        | y = 701776x - 1626112  | 0.9294                            | 5.45E-07      | y = 0.0618x - 0.1609 | 0.9773                                  | 6.89E-12            |
|                                                                            | SRFA 10 mg L <sup>-1</sup> | y = 373620x - 226099   | 0.9982                            | 2.67E-12      | y = 0.0489x - 0.0234 | 0.9978                                  | 6.56E-15            |
|                                                                            | Elbe                       | y = 541921x - 842505   | 0.7690                            | 8.06E-04      | y = 0.0584x - 0.1421 | 0.9958                                  | 9.64E-17            |
|                                                                            | Strob.                     | y = 594537x - 1563531  | 0.9990                            | 1.37E-17      | y = 0.0549x - 0.0874 | 0.9986                                  | 1.29E-11            |
| Isoferulic acid 3-O-β-D-glucuronide<br>RT 15.01 min                        | MQW                        | y = 1485234x - 2186603 | 0.8683                            | 2.69E-05      | y = 0.1006x - 0.1094 | 0.9804                                  | 1.48E-10            |
|                                                                            | SRFA 10 mg L <sup>-1</sup> | y = 1041394x - 631967  | 0.9995                            | 1.01E-14      | y = 0.0748x - 0.0267 | 0.9990                                  | 1.82E-13            |
|                                                                            | Elbe                       | y = 1378398x - 1140110 | 0.9972                            | 6.38E-15      | y = 0.0927x - 0.0428 | 0.9882                                  | 3.89E-11            |
|                                                                            | Strob.                     | y = 1351206x - 1251206 | 0.9954                            | 1.37E-13      | y = 0.0959x - 0.0899 | 0.9943                                  | 4.90E-13            |
| Leu-enkephalin<br>RT 16.20 min                                             | MQW                        | y = 470395x - 419901   | 0.9345                            | 3.38E-07      | y = 0.0404x - 0.0505 | 0.9866                                  | 7.05E-08            |
|                                                                            | SRFA 10 mg L <sup>-1</sup> | y = 172487x - 81563    | 0.9866                            | 2.17E-08      | y = 0.0215x - 0.0113 | 0.9825                                  | 5.25E-04            |
|                                                                            | Elbe                       | y = 81393x - 166258    | 0.8548                            | 4.91E-05      | y = 0.0391x + 0.0320 | 0.7851                                  | 1.69E-07            |
|                                                                            | Strob.                     | y = 336556x - 467857   | 0.9522                            | 1.55E-07      | y = 0.0370x - 0.0035 | 0.9515                                  | 1.42E-10            |
| Vanilic acid<br>RT 15.30 min                                               | MQW                        | y = 106929x - 629983   | 0.9673                            | 4.03E-09      | y = 0.0076x - 0.0227 | 0.9915                                  | 6.46E-13            |
|                                                                            | SRFA 10 mg L <sup>-1</sup> | y = 147777x - 188842   | 0.9969                            | 2.86E-11      | y = 0.0078x - 0.0395 | 0.9995                                  | 6.27E-15            |
|                                                                            | Elbe                       | y = 157110x - 863815   | 0.9931                            | 1.72E-13      | y = 0.0060x - 0.0349 | 0.9951                                  | 1.85E-14            |
|                                                                            | Strob.                     | y = 109103x - 1640825  | 0.9828                            | 3.60E-10      | y = 0.0074x + 0.0229 | 0.9970                                  | 3.86E-10            |

#### SI 4 – Repeatability and effect of PCI-IS on DOM MFs

**Table SI 4.1** - Coefficient of variance (CV) mean of all testable molecular formulas (MFs) at different SRFA carbon concentrations (2.0, 2.5, 5.0, 10, and 15 mg C L<sup>-1</sup>) and retention time (RT, min) for ISN and RAW.

| SRFA concentration (mg C L <sup>-1</sup> ) | RT (min) | Mean of CV for all testable MFs |      |
|--------------------------------------------|----------|---------------------------------|------|
|                                            |          | ISN                             | RAW  |
| 2.0                                        | 11       | 17.5                            | 15.7 |
|                                            | 12       | 15.0                            | 14.2 |
|                                            | 13       | 14.9                            | 13.6 |
|                                            | 14       | 15.0                            | 13.3 |
|                                            | 15       | 15.1                            | 14.1 |
|                                            | 16       | 14.9                            | 14.0 |
|                                            | 17       | 15.5                            | 14.6 |
|                                            | 18       | 17.5                            | 15.7 |
| <b>Mean CV of RTs</b>                      |          | 15                              | 15   |
| 2.5                                        | 11       | 14.9                            | 15.2 |
|                                            | 12       | 14.7                            | 15.9 |
|                                            | 13       | 13.7                            | 14.9 |
|                                            | 14       | 13.3                            | 15.0 |
|                                            | 15       | 14.4                            | 14.9 |
|                                            | 16       | 14.0                            | 14.9 |
|                                            | 17       | 14.5                            | 15.4 |
|                                            | 18       | 15.3                            | 17.2 |
| <b>Mean CV of RTs</b>                      |          | 14                              | 15   |
| 5.0                                        | 11       | 13.7                            | 14.8 |
|                                            | 12       | 13.2                            | 12.4 |
|                                            | 13       | 12.7                            | 12.2 |
|                                            | 14       | 12.0                            | 11.8 |
|                                            | 15       | 12.2                            | 12.0 |
|                                            | 16       | 14.1                            | 13.0 |
|                                            | 17       | 13.8                            | 13.4 |
|                                            | 18       | 14.9                            | 14.4 |
| <b>Mean CV of RTs</b>                      |          | 13                              | 13   |
| 10                                         | 11       | 13.7                            | 13.7 |
|                                            | 12       | 12.0                            | 12.0 |
|                                            | 13       | 12.5                            | 12.0 |
|                                            | 14       | 11.8                            | 12.0 |
|                                            | 15       | 11.8                            | 11.7 |
|                                            | 16       | 12.7                            | 12.3 |
|                                            | 17       | 13.6                            | 13.4 |
|                                            | 18       | 13.5                            | 13.4 |
| <b>Mean CV of RTs</b>                      |          | 13                              | 13   |
| 15                                         | 11       | 10.4                            | 12.4 |
|                                            | 12       | 12.3                            | 11.9 |
|                                            | 13       | 13.9                            | 13.4 |
|                                            | 14       | 13.0                            | 12.9 |
|                                            | 15       | 13.1                            | 12.8 |
|                                            | 16       | 11.2                            | 10.8 |
|                                            | 17       | 11.7                            | 11.5 |
|                                            | 18       | 12.7                            | 12.7 |
| <b>Mean CV of RTs</b>                      |          | 12                              | 12   |

## SI 5 – Linearity of DOM MF peak intensity

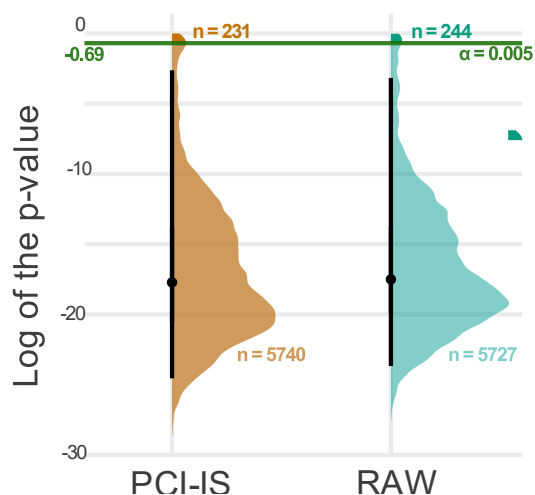

**Figure SI 5.1** – Density plot of the  $p$ -values of all testable molecular formulas (MFs, found more than 10 times) in SRFA (from 2 to 15 mg C L<sup>-1</sup>) for the tested normalization methods. Log  $p$ -value of -0.69 represents the 5% confidence interval threshold (orange line).

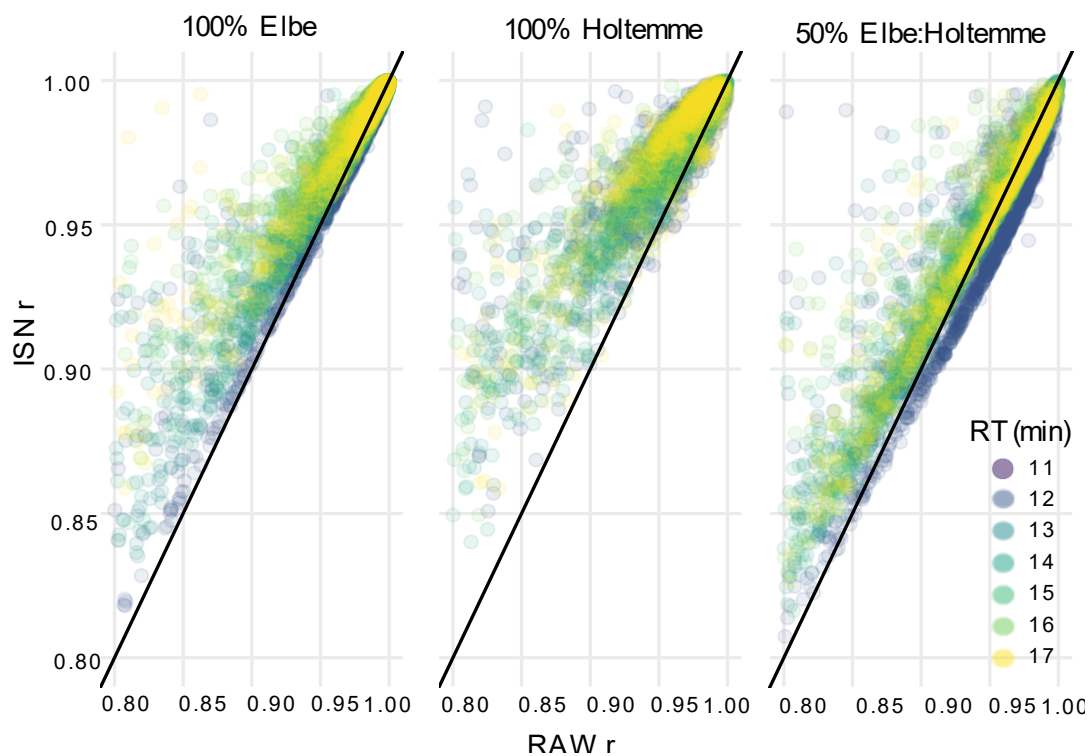

**Figure SI 5.2.** Pearson's correlation coefficients ( $r$ ) for individual molecular formulas (MFs) using RAW and ISN for 100% Elbe, 50% Elbe:Holtemme and 100% Holtemme. The black line represents the identity. MFs are colored by the retention time (RT). The negative or low-correlated values correspond to 12% of all MFs. These MFs may correspond to DOM which are structurally more susceptible to suppression or represent contaminants.

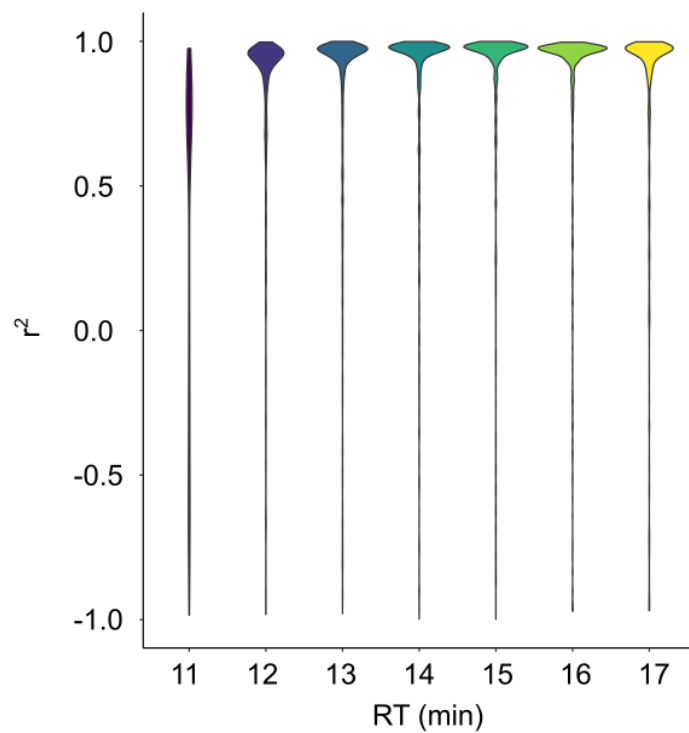

**Figure SI 5.3.** Squared linear correlation coefficient ( $r^2$ ) for individual molecular formulas (MFs) using ISN for 100% Elbe, 50% Elbe:Holtemme and 100% Holtemme combined separated by the retention time (RT).

## SI 6 – Matrix effects in original, non-extracted freshwater samples

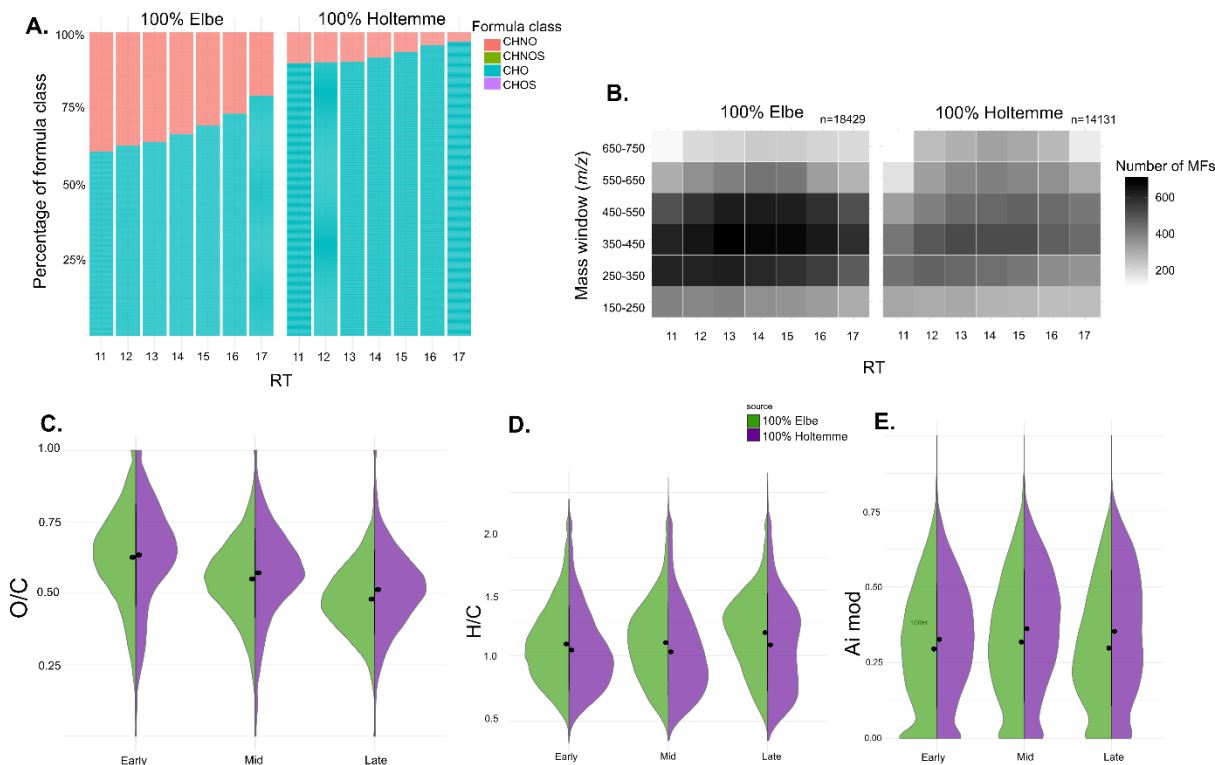

**Figure SI 6.1 – Original samples (Holtemme and Elbe chemical composition A)** Percentage of molecular formula (MF) classes in each retention time RT segment of both samples: 100% Elbe and 100% Holtemme. **B)** Assigned MFs in different segments and mass windows. **C)** O/C, **D)** H/C and **E)** Modified aromaticity index (AI<sub>mod</sub>)<sup>2</sup> of 100% Elbe (green) and 100% Holtemme (purple) for early (10-11.5 min), mid (10.5-13 min) and late (13-17 min) eluting compounds. The dots in C)-E) represent the mean.

### Additional References

- 1 N. Kamjunke, N. Hertkorn, M. Harir, P. Schmitt-Kopplin, C. Griebler, M. Brauns, W. von Tümpling, M. Weitere and P. Herzsprung, *Water Res.*, 2019, **164**, 114919.
- 2 A. Zhrebker, O. J. Lechtenfeld, A. Sarycheva, Y. Kostyukevich, O. Kharybin, E. I. Fedoros, E. N. Nikolaev and S. I. of K. Paper, *Anal. Chem.*, 2020, **92**, 9032–9038.
